# Supplementary material
Source: publisher figshare collection journal article supplement (https://acs.figshare.com/ndownloader/files/10068655)
Supplement: Supplementary file 1 [file 10068655]

## Supporting information

### Nano Ag/ZnO Incorporated Hydroxyapatite Composite Coatings: Highly Effective Infection Prevention and Excellent Osteointegration

*Yanzhe Zhang<sup>a</sup>, Xiangmei Liu<sup>a</sup>, Zhaoyang Li<sup>b</sup>, Shengli Zhu<sup>b</sup>, Xubo Yuan<sup>b</sup>, Zhenduo Cui<sup>b</sup>, Xianjin Yang<sup>b</sup>, Paul K Chu<sup>c</sup>, Shuilin Wu<sup>a,b,\*</sup>*

<sup>a</sup> Hubei Collaborative Innovation Center for Advanced Organic Chemical Materials, Ministry-of-Education Key Laboratory for the Green Preparation and Application of Functional Materials, Hubei Key Laboratory of Polymer Materials, School of Materials Science & Engineering, Hubei University, Wuhan 430062, China

<sup>b</sup> School of Materials Science & Engineering, Tianjin University, Tianjin 300072, China

<sup>c</sup> Department of Physics and Department of Materials Science and Engineering, City University of Hong Kong, Tat Chee Avenue, Kowloon, Hong Kong, China

\* To whom correspondence should be addressed:

E-mail: [shuilin.wu@gmail.com](mailto:shuilin.wu@gmail.com); [shuilinwu@tju.edu.cn](mailto:shuilinwu@tju.edu.cn) (S.L. Wu)

**Keywords:** Antibacterial; Implant; Osteointegration; Laser cladding; Composite coating; Infection prevention

## **Table of Contents**

**Section S1.** Structure analysis of materials by TEM (Page S-3)

**Section S2.** The Contact angles of samples (Page S-4)

**Section S3.** The antibacterials tests for *E. coli* and *S. aureus*. (Page S-5)

**Section S4.** The surface analysis of materials by SEM (Page S-6)

**Section S5.** The non-mineralized section of MC3T3-E1 cell (Page S-7)

**Section S6.** The osteogenesis effect of samples (Page S-8)

**Section S7.** The sample implanted effect (Page S-9)

## Section S1. Structure analysis of materials by TEM

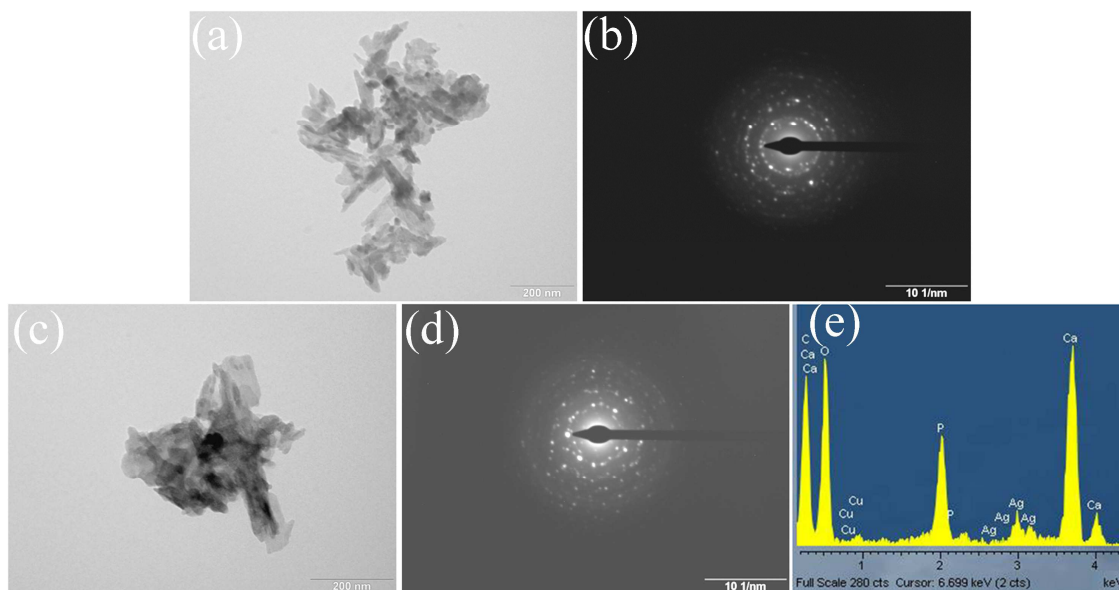

Figure S1. (a) TEM image of HA powders; (b) Selected-area electron diffraction (SAED) pattern of HA powders; (c) TEM image of Ag10ZnO0HA powders; (d) SAED pattern and (e) EDS scan of Ag10ZnO0HA powders.

## Section S2. The Contact angles of samples

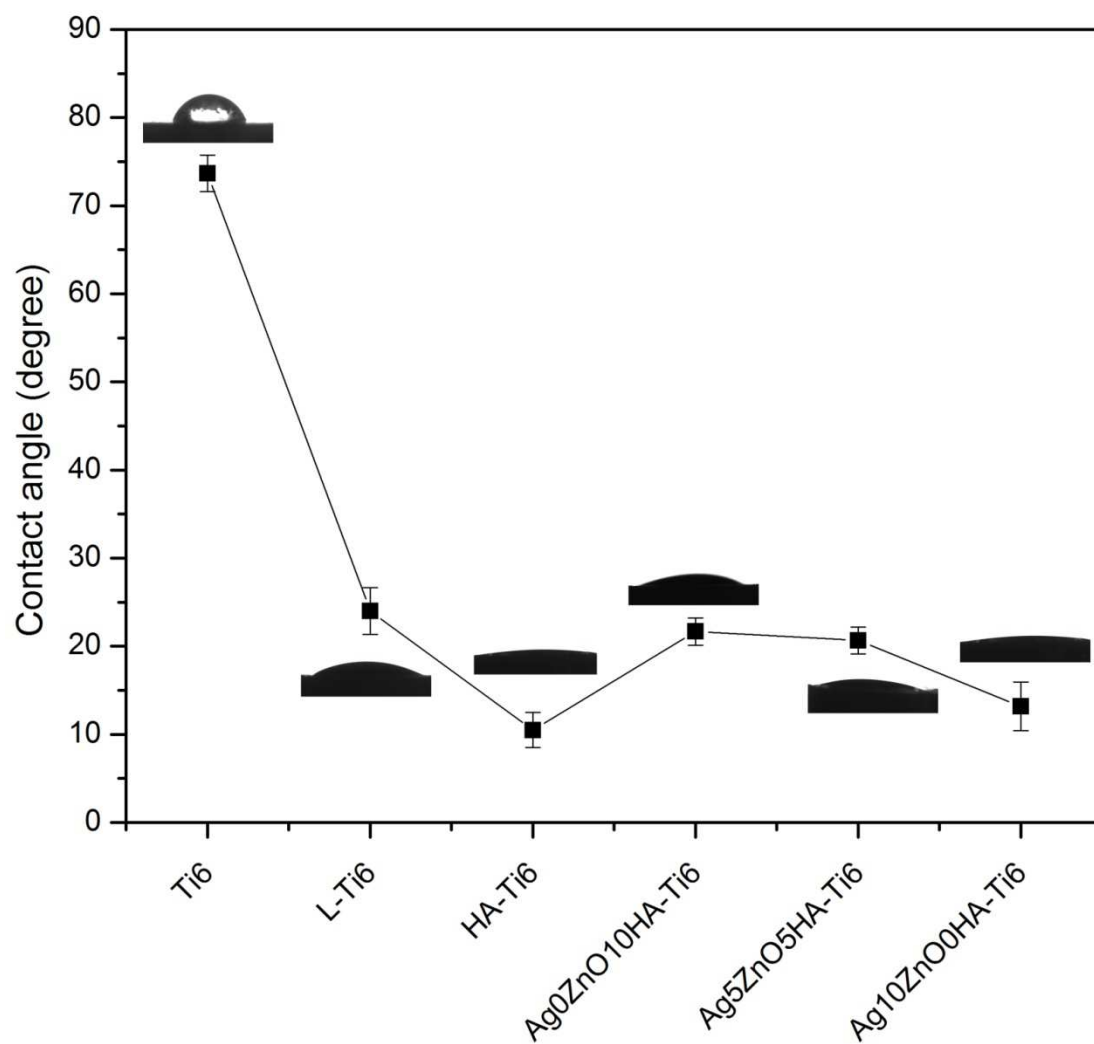

Figure S2. Contact angles on Ti6, L-Ti6, HA-Ti6, Ag0ZnO10HA-Ti6, Ag5ZnO5HA-Ti6, and Ag10ZnO0HA-Ti6.

**Section S3.** The antibacterials tests for *E. coli* and *S. aureus*.

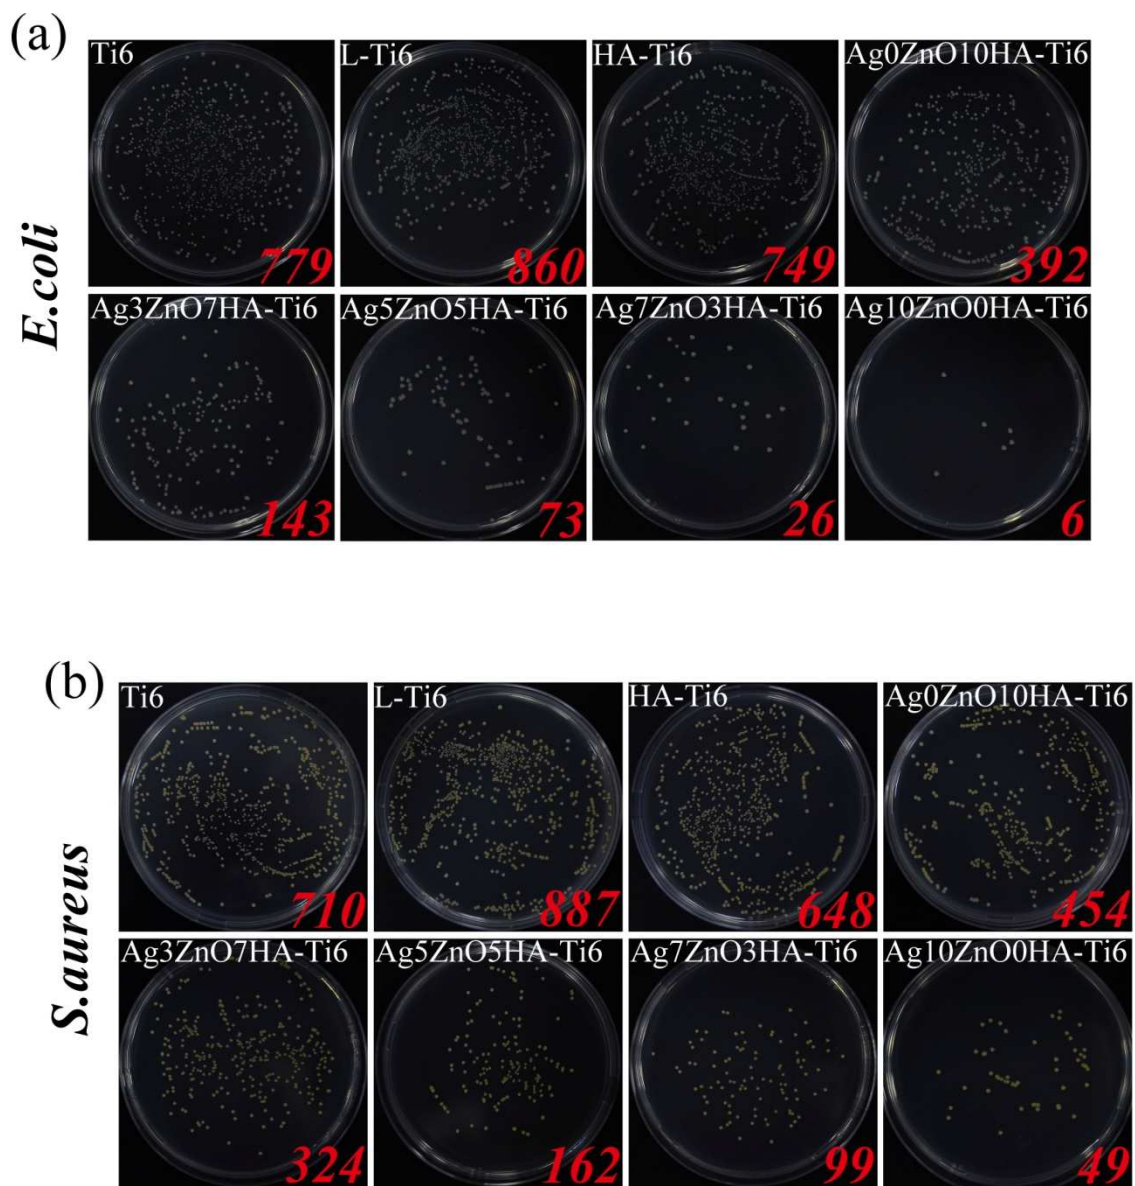

Figure S3. Plate counting of all samples for (a) *E. coli* and (b) *S. aureus*.

**Section S4.** The surface analysis of materials by SEM

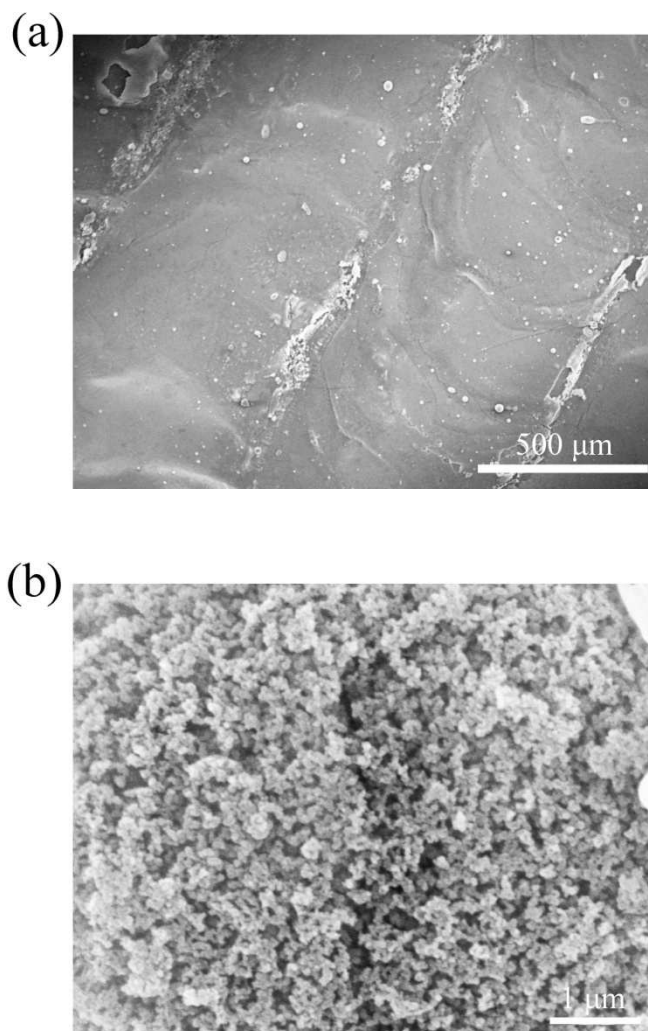

Figure S4. (a) Low-magnification SEM image of L-Ti6 and (b) High-magnification SEM image of L-Ti6.

**Section S5.** The non-mineralized section of MC3T3-E1 cell

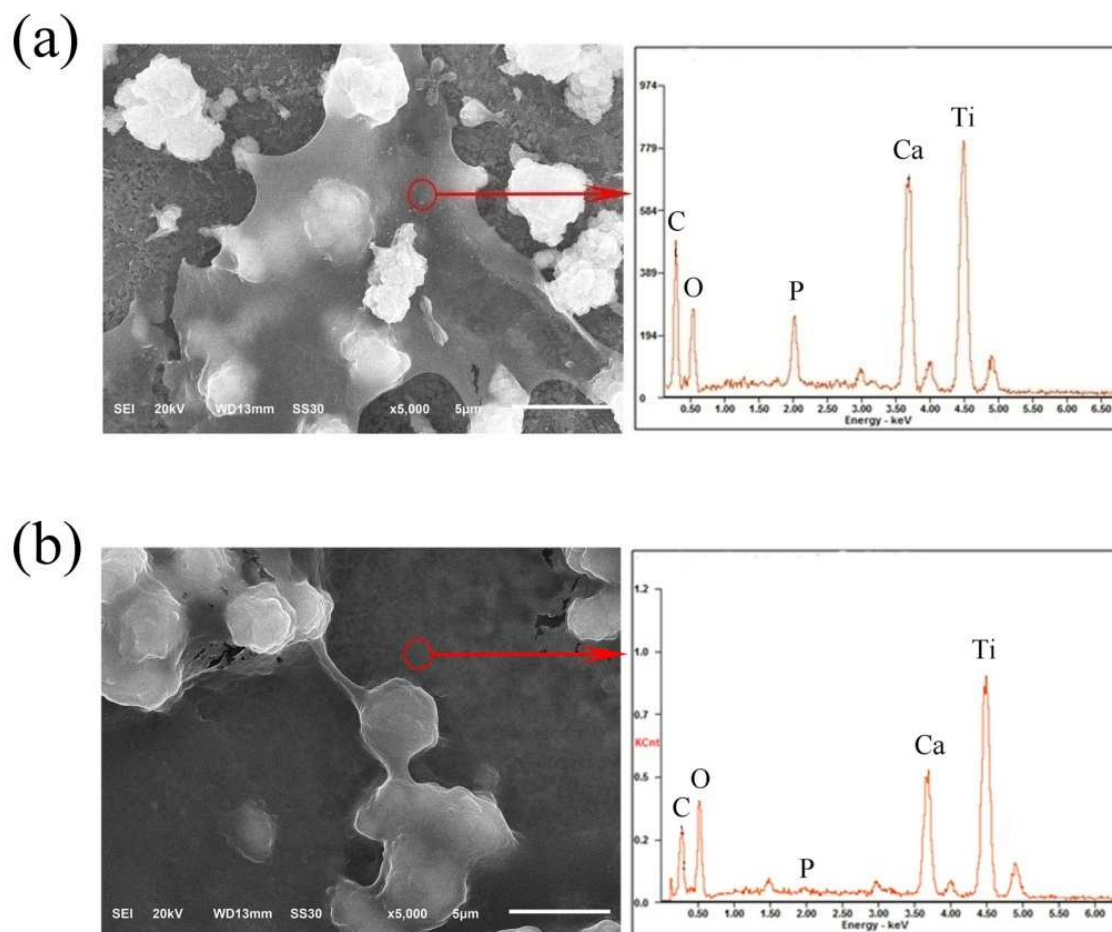

Figure S5. SEM images of MC3T3-E1 cell incubated on Ag7ZnO3HA-Ti6 (7:3:90, wt%) and EDS scan of the non-mineralized section after (a)10 days and (b) 20 days.

**Section S6.** The osteogenesis effect of samples

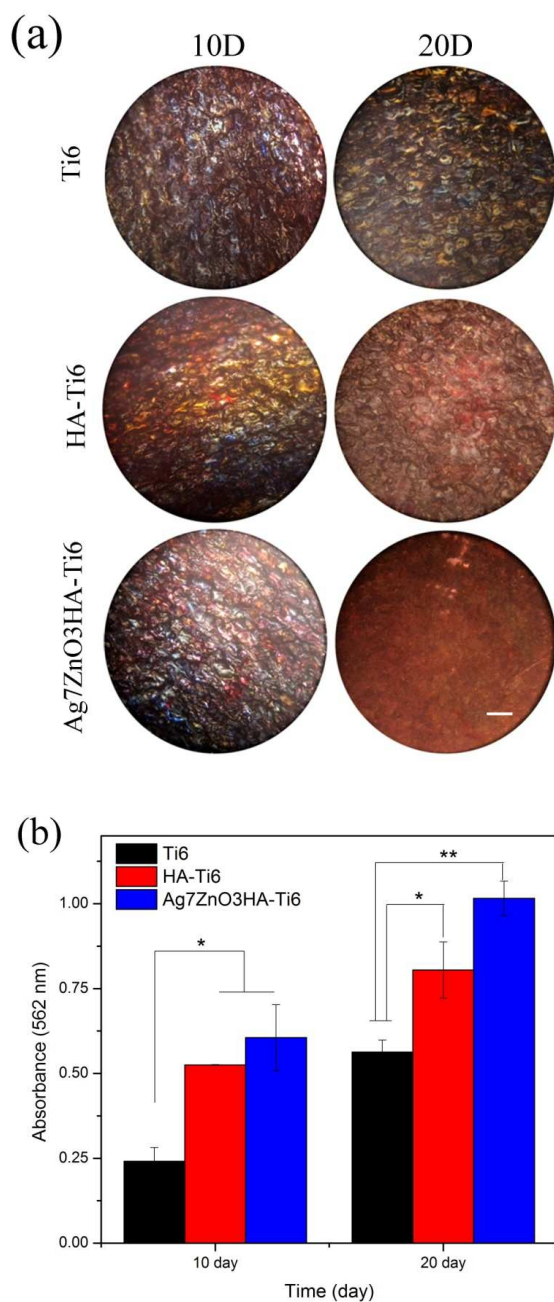

Figure S6. (a) Alizarin red staining of cell seeded on Ti6, HA-Ti6, and Ag7ZnO3HA-Ti6 (7:3:90, wt%) after 10 days and 20 days (scale bar = 200  $\mu$ m); (b) Quantitative analysis of the Alizarin red staining samples cultured for 10 days and 20 days.



**Section S7.** The sample implanted effect

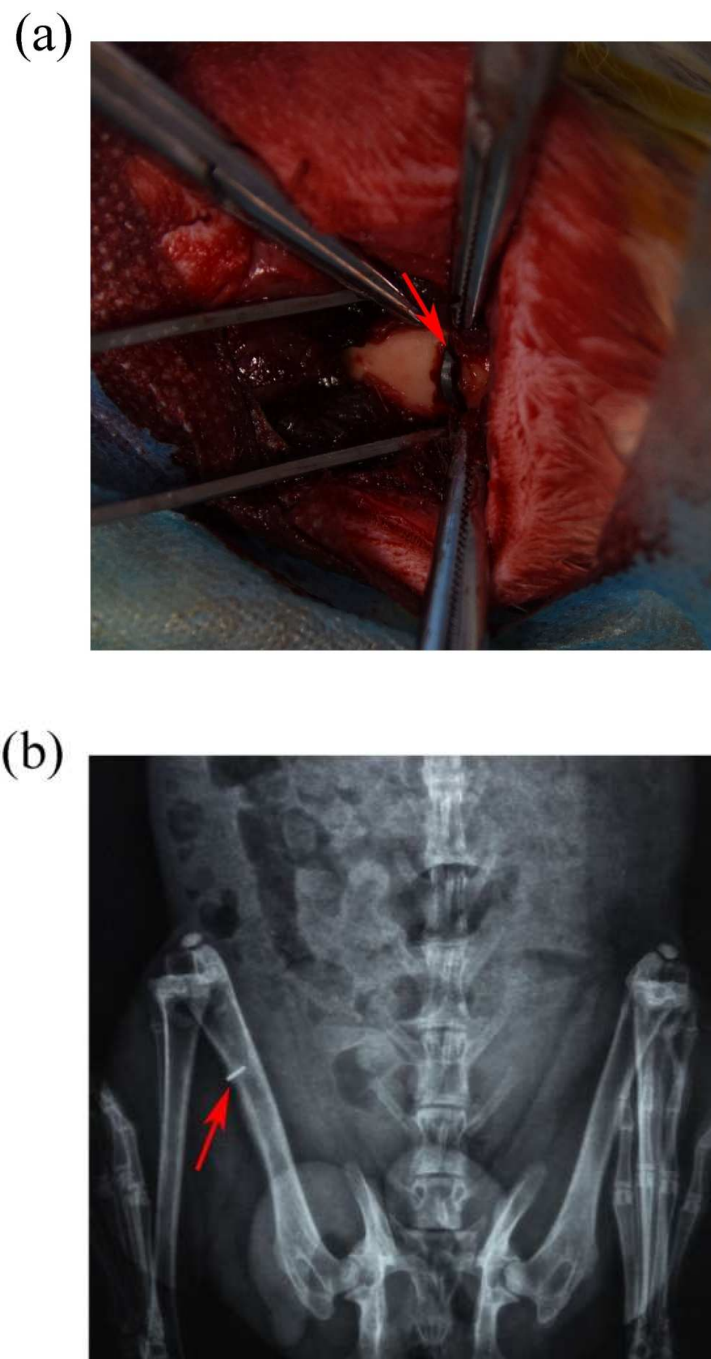

Figure S7. (a) Image of the sample implanted in the rabbit femur and (b) X-ray photo after 5 weeks.
